# Supplementary material for: Carbon–nitrogen coupling under three schemes of model representation: a traceability analysis
Source: Copernicus journal article supplement (doi:10.5194/gmd-11-4399-2018), 2018-11-02
Supplement: Supplementary file 1 [file gmd-11-4399-2018-supplement.pdf]

Supplement of Geosci. Model Dev., 11, 4399–4416, 2018  
<https://doi.org/10.5194/gmd-11-4399-2018-supplement>  
© Author(s) 2018. This work is distributed under  
the Creative Commons Attribution 4.0 License.

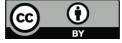

*Supplement of*

## **Carbon–nitrogen coupling under three schemes of model representation: a traceability analysis**

**Z. Du et al.**

*Correspondence to:* Xuhui Zhou (xhzhou@des.ecnu.edu.cn) and Jianyang Xia (jyxia@des.ecnu.edu.cn)

The copyright of individual parts of the supplement might differ from the CC BY 4.0 License.

1 **Supplemental information**

2 **Figure S1**

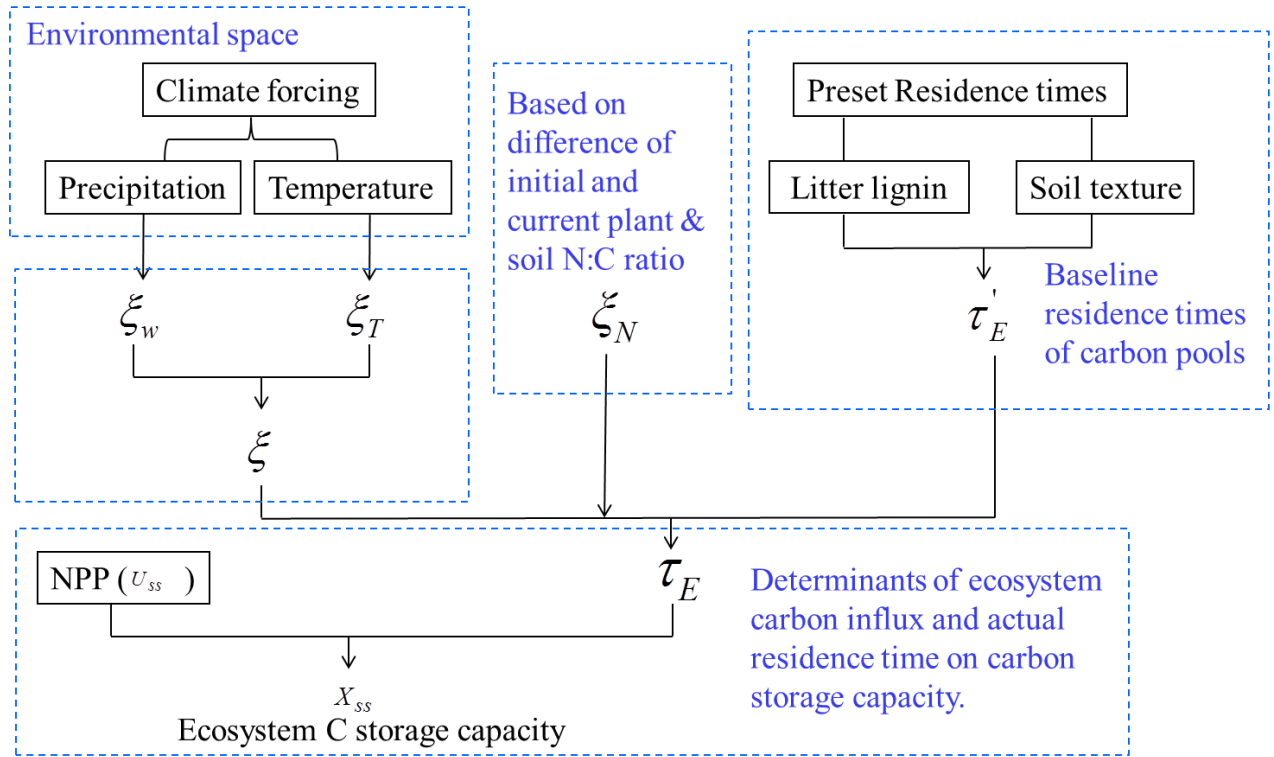

3

4 **Figure S1.** Schematic diagram of the traceability analysis framework.  $X_{ss}$ , ecosystem carbon  
5 storage capacity;  $\tau_E$ , ecosystem carbon residence time;  $\tau'_E$ , baseline carbon residence time;  $\xi_N$ ,  
6 nitrogen scalar;  $\xi$ , environmental scalar;  $\xi_T$ , temperature scalar;  $\xi_W$ , water scalar.

7

8 **Figure S2**

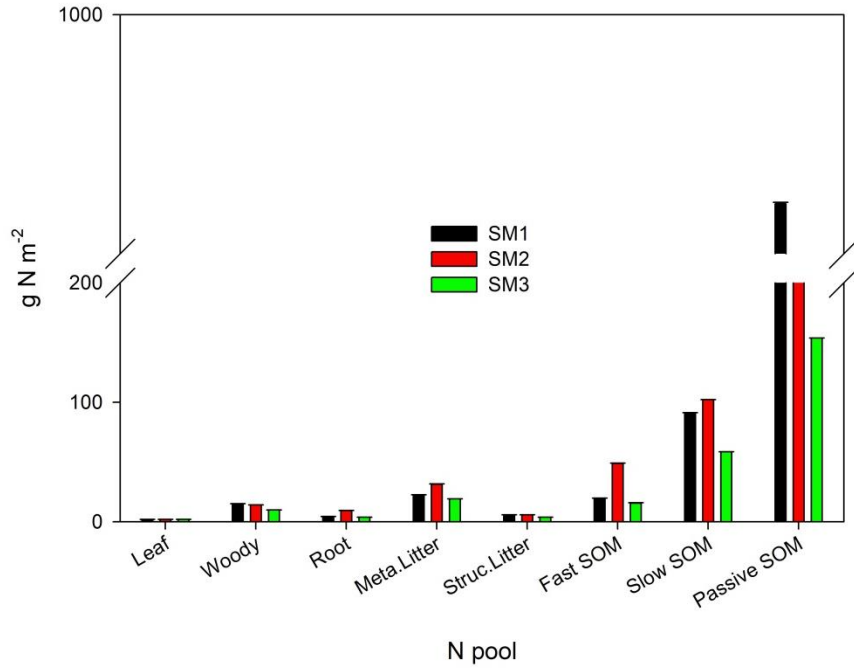

9

10 **Figure S2.** The annual average sizes of nitrogen for each carbon pool at the steady-state among  
11 1996-2007 for the three C-N schemes (SM1, SM2 and SM3)
